# Supplementary material for: A New Approach to Reduce Toxicities and to Improve Bioavailabilities of Platinum-Containing Anti-Cancer Nanodrugs
Source: PubMed Central journal article supplement (PMC4454134; doi:10.1038/srep10881), 2015-06-03
Supplement: srep10881-s1.pdf [file srep10881-s1.pdf]

## Supplementary Information

### A New Approach to Reduce Toxicities and to Improve Bioavailabilities of Platinum-Containing Anti-Cancer Nanodrugs

Li Liu<sup>1†</sup>, Qing Ye<sup>1†</sup>, Maggie Lu<sup>2</sup>, Ya-Chin Lo<sup>2</sup>, Yuan-Hung Hsu<sup>2</sup>, Ming-Cheng Wei<sup>2</sup>, Yu-Hsiang Chen<sup>3</sup>, Shen-Chuan Lo<sup>3</sup>, Shian-Jy Wang<sup>3</sup>, Daniel J. Bain<sup>4</sup>, Chien Ho<sup>1\*</sup>

<sup>1</sup> Department of Biological Sciences, Carnegie Mellon University, Pittsburgh, PA; <sup>2</sup> Biomedical Technology and Device Research Laboratories, Industrial Technology Research Institute, Hsinchu, Taiwan; <sup>3</sup> Material and Chemical Research Laboratories, Industrial Technology Research Institute, Hsinchu, Taiwan; <sup>4</sup> Department of Geology and Planetary Science, University of Pittsburgh, Pittsburgh, PA.

<sup>†</sup>LL and QY contributed equally.

\* Correspondence author at: Chien Ho, Department of Biological Sciences, Carnegie Mellon University, 4400 Fifth Ave, Pittsburgh, PA 15213, USA; Tel: +1 412 268 3395; Fax: +1 412 268 7083; E-mail address: [chienho@andrew.cmu.edu](mailto:chienho@andrew.cmu.edu)

## Figures

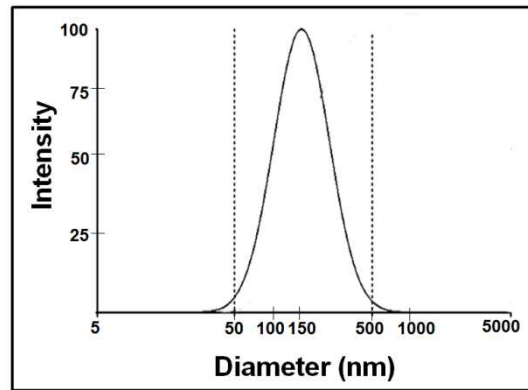

**Fig S1.** Dynamic light scattering (DLS) analysis of the hydrodynamic diameter of DACHPt/HANP.

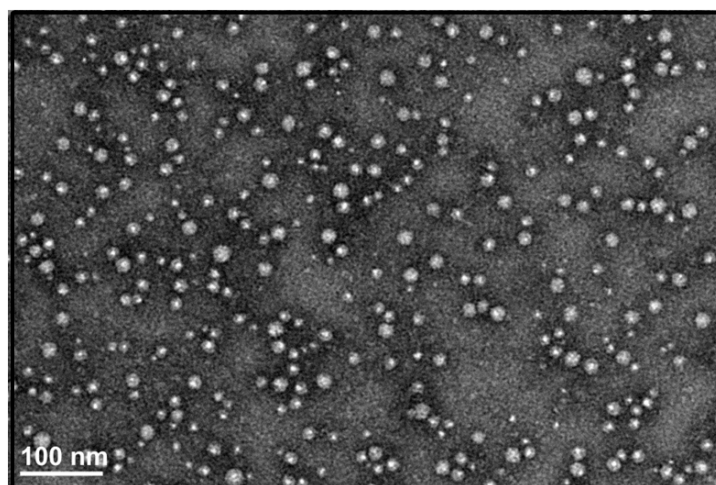

**Fig S2.** Cryo transmission electron microscope (Cryo-TEM) image of DACHPt/HANP.

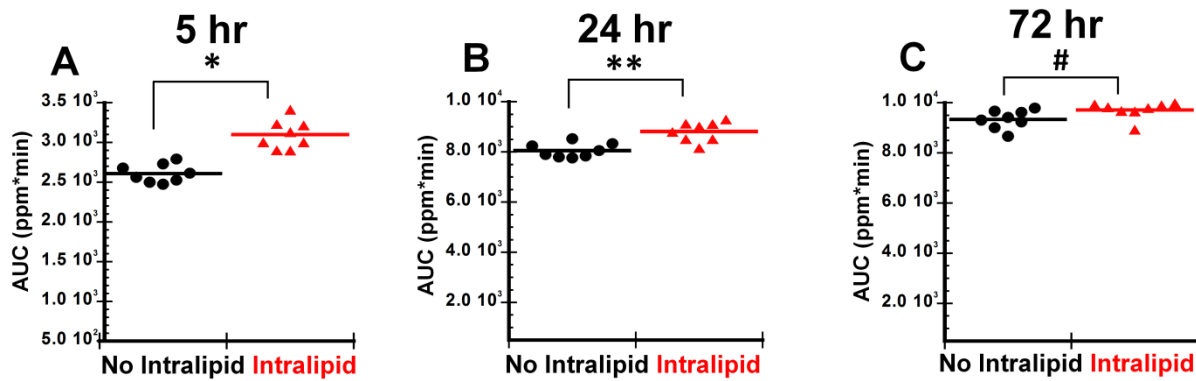

**Fig S3.** Changes in the bioavailability of DACHPt/HANP nanodrug [calculated by the area under the curve (AUC), by the trapezoidal rule, using KaleidaGraph 4.1 (Synergy Software, Reading, PA)] upon Intralipid pre-treatment: (A) 5 hr; (B) 24 hr; (C) 72 hr after the nanodrug administration. \*  $p < 0.0001$ ; \*\*  $p < 0.001$ ; #  $p > 0.05$ .
